# Supplementary material
Source: HighWire-hosted journal article supplement (https://genome.cshlp.org/content/suppl/2003/03/21/13.3.413)
Supplement: Carborg.zip [file Carlborg_Supp.pdf › Carlborg_Supp.pdf]

## Body weight at 1 day of age

|       | 1-337 | 14-11 |
|-------|-------|-------|
| 1-337 |       | S     |
| 14-11 | E     |       |

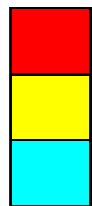

Significant using 5% genome-wide threshold  
 Significant using 10% genome-wide threshold  
 Significant using 20% genome-wide threshold

|    |
|----|
| F  |
| S  |
| FS |
| E  |

Significant using forward selection  
 Significant using SIM  
 Significant using forward selection and SIM  
 Epistatic model selected for QTL pair

# Body weight at 8 days of age

|       | 1-63 | 1-417 | 1-475 | 2-168 | 3-30 | 3-117 | 3-167 | 3-219 | 4-125 | 7-11 | 8-61 | 11-93 | 12-60 | 18-21 |  |
|-------|------|-------|-------|-------|------|-------|-------|-------|-------|------|------|-------|-------|-------|--|
| 1-63  | F    | S     |       |       | FS   | S     |       | S     |       |      | FS   | FS    |       |       |  |
| 1-417 |      | F     |       |       |      |       |       |       |       |      | S    | S     |       |       |  |
| 1-475 |      |       |       |       |      |       |       |       |       |      |      |       | S     |       |  |
| 2-168 |      |       |       |       |      | S     |       |       |       | S    |      |       |       |       |  |
| 3-30  |      |       |       |       | F    | S     |       |       |       |      | FS   | FS    |       |       |  |
| 3-117 |      |       |       | E     |      |       |       |       |       |      | S    | S     |       | S     |  |
| 3-167 |      |       |       |       |      |       |       |       |       |      | S    |       |       |       |  |
| 3-219 | E    |       |       |       |      |       |       |       |       |      |      |       |       |       |  |
| 4-125 |      |       |       |       |      |       |       |       |       |      |      |       |       |       |  |
| 7-11  |      |       |       | E     |      |       |       |       |       |      |      |       |       |       |  |
| 8-61  |      |       |       |       |      | E     | E     |       |       |      | F    | FS    | S     |       |  |
| 11-93 | E    |       |       |       | E    | E     |       |       |       |      |      | F     |       |       |  |
| 12-60 |      |       | E     |       |      |       |       |       |       |      | E    |       |       |       |  |
| 18-21 |      |       |       |       |      | E     |       |       |       |      |      |       |       |       |  |

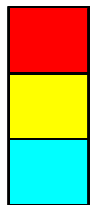

Significant using 5% genome-wide threshold  
 Significant using 10% genome-wide threshold  
 Significant using 20% genome-wide threshold

|    |
|----|
| F  |
| S  |
| FS |
| E  |

Significant using forward selection  
 Significant using SIM  
 Significant using forward selection and SIM  
 Epistatic model selected for QTL pair

# Body weight at 46 days of age

|          | 1-63 | 1-417 | 2-255 | 2-411 | 3-117 | 3-167 | 6-82 | 8-61 | 11-57 | 11-93 | 12-60 | 13-7 | 15-32 | E47W24-0 |
|----------|------|-------|-------|-------|-------|-------|------|------|-------|-------|-------|------|-------|----------|
| 1-63     | F    | FS    |       |       | FS    |       |      |      | S     | FS    | FS    |      |       |          |
| 1-417    |      | F     |       |       | FS    |       |      |      | S     | FS    | S     |      |       |          |
| 2-255    |      |       |       |       | S     |       |      |      | S     |       |       |      |       |          |
| 2-411    |      |       |       |       | S     |       |      |      |       | S     |       |      |       |          |
| 3-117    |      |       | E     | E     | F     | S     |      |      | S     | S     | S     |      | S     | S        |
| 3-167    |      |       |       |       |       |       |      |      | S     |       |       |      |       |          |
| 6-82     |      |       |       |       |       |       |      |      | S     |       |       |      |       |          |
| 8-61     |      |       |       |       |       |       |      |      | S     |       |       |      |       |          |
| 11-57    |      |       | E     |       |       |       |      |      |       | S     | S     | S    |       |          |
| 11-93    |      |       |       |       |       |       |      |      | E     | F     | S     | S    |       |          |
| 12-60    |      |       |       |       |       |       |      |      | E     |       | F     | S    |       | S        |
| 13-7     |      |       |       |       |       |       |      |      |       | E     |       |      |       | S        |
| 15-32    |      |       |       |       | E     |       |      |      |       |       |       |      |       |          |
| E47W24-0 |      |       |       |       | E     |       |      |      |       |       | E     |      |       |          |

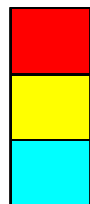

Significant using 5% genome-wide threshold  
Significant using 10% genome-wide threshold  
Significant using 20% genome-wide threshold

|    |
|----|
| F  |
| S  |
| FS |
| E  |

Significant using forward selection  
Significant using SIM  
Significant using forward selection and SIM  
Epistatic model selected for QTL pair

# Body weight at 112 days of age

|          | 1-63 | 1-417 | 2-29 | 2-255 | 3-117 | 3-167 | 3-219 | 4-125 | 5-28 | 6-82 | 7-128 | 8-61 | 11-57 | 12-60 | E47W24-0 | 27-14 |
|----------|------|-------|------|-------|-------|-------|-------|-------|------|------|-------|------|-------|-------|----------|-------|
| 1-63     | F    | FS    |      |       | S     | S     | FS    | FS    |      |      | FS    |      |       | FS    |          | FS    |
| 1-417    |      | F     | S    |       | S     | S     | FS    | FS    |      |      | FS    |      |       | FS    |          | FS    |
| 2-29     |      | E     |      |       |       |       |       |       |      |      |       |      |       | S     |          |       |
| 2-255    |      |       |      |       |       |       |       |       |      |      |       |      |       |       |          | S     |
| 3-117    |      |       |      |       |       |       |       |       |      |      | S     |      |       |       | S        | S     |
| 3-167    |      |       |      |       |       |       |       | S     |      |      | S     |      |       | S     |          | S     |
| 3-219    |      |       |      |       |       |       | F     |       |      |      |       |      |       | FS    | S        | FS    |
| 4-125    |      |       |      |       |       |       |       | F     |      |      | FS    |      | S     | S     |          | FS    |
| 5-28     |      |       |      |       |       |       |       |       |      | S    |       |      |       | S     |          | S     |
| 6-82     |      |       |      |       |       |       |       |       | E    |      |       |      |       | S     |          |       |
| 7-128    |      |       |      |       |       |       |       |       |      |      | F     |      |       | FS    |          |       |
| 8-61     |      |       |      |       |       |       |       |       |      |      |       |      |       |       |          | S     |
| 11-57    |      |       |      |       |       |       |       | E     |      |      |       |      |       |       |          | S     |
| 12-60    |      |       |      |       |       |       |       | E     |      |      |       |      |       | F     | S        | S     |
| E47W24-0 |      |       |      |       | E     |       |       |       |      |      |       |      |       | E     |          |       |
| 27-11    |      |       |      | E     |       |       |       |       |      |      |       | E    |       | E     |          | F     |

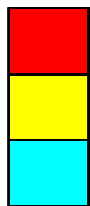

Significant using 5% genome-wide threshold  
 Significant using 10% genome-wide threshold  
 Significant using 20% genome-wide threshold

|    |
|----|
| F  |
| S  |
| FS |
| E  |

Significant using forward selection  
 Significant using SIM  
 Significant using forward selection and SIM  
 Epistatic model selected for QTL pair

## Body weight at 200 days of age

|       | 1-63 | 1-417 | 2-411 | 3-167 | 3-219 | 5-28 | 7-128 | 9-36 | 12-60 | 27-14 |
|-------|------|-------|-------|-------|-------|------|-------|------|-------|-------|
| 1-63  | F    | FS    | FS    | S     | FS    | FS   |       |      |       | FS    |
| 1-417 |      | F     | FS    | S     | FS    | FS   |       | S    |       | FS    |
| 2-411 |      |       | F     | S     |       | FS   |       |      |       | FS    |
| 3-167 |      |       |       |       |       | S    | S     |      | S     | S     |
| 3-219 |      |       |       |       | F     | FS   |       |      |       | FS    |
| 5-28  | E    |       |       | E     |       | F    |       |      |       | FS    |
| 7-128 |      |       |       |       |       |      |       |      |       |       |
| 9-36  |      | E     |       |       |       |      |       |      |       |       |
| 12-60 |      |       |       |       |       |      |       |      |       |       |
| 27-15 | E    |       |       |       |       |      |       |      |       | F     |

|  |                                             |
|--|---------------------------------------------|
|  | Significant using 5% genome-wide threshold  |
|  | Significant using 10% genome-wide threshold |
|  | Significant using 20% genome-wide threshold |

|    |                                             |
|----|---------------------------------------------|
| F  | Significant using forward selection         |
| S  | Significant using SIM                       |
| FS | Significant using forward selection and SIM |
| E  | Epistatic model selected for QTL pair       |

## Growth from 1 to 8 days of age

|       | 1-63 | 1-417 | 2-168 | 3-30 | 3-117 | 3-219 | 5-89 | 6-82 | 8-61 | 13-7 | 18-21 |
|-------|------|-------|-------|------|-------|-------|------|------|------|------|-------|
| 1-63  | F    |       |       |      | FS    | S     |      |      | FS   |      |       |
| 1-417 |      | F     | S     |      |       |       |      |      | S    | S    |       |
| 2-168 |      | E     |       |      |       |       |      |      |      |      |       |
| 3-30  |      |       |       |      | S     |       | S    |      |      |      |       |
| 3-117 | E    |       |       | E    | F     | FS    |      |      | FS   | S    | S     |
| 3-219 | E    |       |       |      |       |       |      |      | FS   |      |       |
| 5-89  |      |       |       | E    |       |       |      |      |      |      |       |
| 6-82  |      |       |       |      |       |       |      |      |      | S    |       |
| 8-61  | E    | E     |       |      | E     | E     |      |      | F    |      |       |
| 13-7  |      | E     |       |      |       |       |      | E    |      |      |       |
| 18-21 |      |       |       |      | E     |       |      |      |      |      |       |

|  |                                             |
|--|---------------------------------------------|
|  | Significant using 5% genome-wide threshold  |
|  | Significant using 10% genome-wide threshold |
|  | Significant using 20% genome-wide threshold |

|    |                                             |
|----|---------------------------------------------|
| F  | Significant using forward selection         |
| S  | Significant using SIM                       |
| FS | Significant using forward selection and SIM |
| E  | Epistatic model selected for QTL pair       |

# Growth from 8 to 46 days of age

|              | 1-63 | 1-417 | 2-280 | 2-468 | 3-117 | 3-167 | 6-82 | 8-61 | E22C19W28-13 | 11-57 | 11-93 | 12-60 | 15-32 | E47W24-0 |
|--------------|------|-------|-------|-------|-------|-------|------|------|--------------|-------|-------|-------|-------|----------|
| 1-63         | F    | FS    |       |       | S     |       |      |      |              | FS    | S     |       |       |          |
| 1-417        |      | F     |       |       |       |       |      |      |              | FS    | S     |       |       |          |
| 2-280        |      |       |       |       |       |       |      |      |              | S     |       |       |       |          |
| 2-468        |      |       |       |       | S     |       |      |      |              |       |       |       |       |          |
| 3-117        | E    |       |       | E     |       | S     |      |      |              |       | S     | S     | S     | S        |
| 3-167        |      |       |       |       |       |       |      | S    |              |       |       |       |       |          |
| 6-82         |      |       |       |       |       |       |      |      |              | S     |       |       |       |          |
| 8-61         |      |       |       |       |       |       |      |      |              | S     |       |       |       |          |
| E22C19W28-13 |      |       |       |       |       |       |      |      |              |       |       | S     |       |          |
| 11-57        |      |       | E     |       |       |       | E    | E    |              | F     |       | S     |       |          |
| 11-93        |      |       |       |       |       |       |      |      |              |       |       |       |       |          |
| 12-60        |      |       |       |       |       |       |      |      | E            | E     |       |       |       | S        |
| 15-32        |      |       |       |       | E     |       |      |      |              |       |       |       |       |          |
| E47W24-0     |      |       |       |       | E     |       |      |      |              |       |       | E     |       |          |

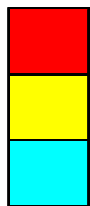

Significant using 5% genome-wide threshold  
 Significant using 10% genome-wide threshold  
 Significant using 20% genome-wide threshold

|    |
|----|
| F  |
| S  |
| FS |
| E  |

Significant using forward selection  
 Significant using SIM  
 Significant using forward selection and SIM  
 Epistatic model selected for QTL pair

## Growth from 46 to 112 days of age

|          | 1-63 | 1-417 | 3-167 | 4-125 | 5-28 | 6-82 | 8-61 | 9-36 | 12-60 | E47W24-0 | 27-14 |
|----------|------|-------|-------|-------|------|------|------|------|-------|----------|-------|
| 1-63     | F    | FS    |       |       | S    |      |      |      |       |          | FS    |
| 1-417    |      | F     |       |       | S    |      |      | S    |       |          | FS    |
| 3-167    |      |       |       |       | S    |      |      |      |       |          | S     |
| 4-125    |      |       |       | F     |      |      |      |      |       |          |       |
| 5-28     | E    |       |       |       |      | S    |      |      | S     |          | S     |
| 6-82     |      |       |       |       | E    |      |      |      |       |          |       |
| 8-61     |      |       |       |       |      |      |      |      |       |          | S     |
| 9-36     |      | E     |       |       |      |      |      |      |       |          |       |
| 12-60    |      |       |       |       | E    |      |      |      |       | S        | S     |
| E47W24-0 |      |       |       |       |      |      |      |      | E     |          |       |
| 27-15    |      |       |       |       | E    |      | E    |      |       |          | F     |

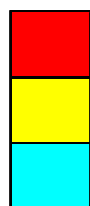

Significant using 5% genome-wide threshold  
 Significant using 10% genome-wide threshold  
 Significant using 20% genome-wide threshold

|    |
|----|
| F  |
| S  |
| FS |
| E  |

Significant using forward selection  
 Significant using SIM  
 Significant using forward selection and SIM  
 Epistatic model selected for QTL pair

## Growth from 112 to 200 days of age

|       | 1-63 | 1-417 |
|-------|------|-------|
| 1-63  | F    | FS    |
| 1-417 |      | F     |

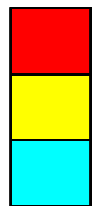

Significant using 5% genome-wide threshold  
 Significant using 10% genome-wide threshold  
 Significant using 20% genome-wide threshold

|    |
|----|
| F  |
| S  |
| FS |
| E  |

Significant using forward selection  
 Significant using SIM  
 Significant using forward selection and SIM  
 Epistatic model selected for QTL pair
